# Supplementary material for: The Effect of Music Intervention on Dental Anxiety During Dental Extraction Procedure
Source: PubMed Central journal article supplement (PMC5712637; doi:10.2174/1874210601711010565), 2017-10-31
Supplement: TODENTJ-11-565_SP.pdf [file TODENTJ-11-565_SP.pdf]

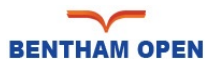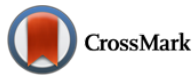

# The Open Dentistry Journal

## Supplementary Material

Content list available at: [www.benthamopen.com/TODENTJ/](http://www.benthamopen.com/TODENTJ/)

DOI: 10.2174/1874210601711010565

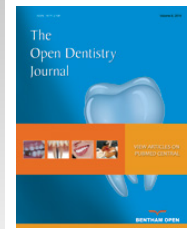

## The Effect of Music Intervention on Dental Anxiety During Dental Extraction Procedure

Tantry Maulina<sup>1,\*</sup>, Nina Djustiana<sup>2</sup> and M. Nurhalim Shahib<sup>3</sup><sup>1</sup>Oral Surgery Department, Faculty of Dentistry, Universitas Padjadjaran, Bandung, Indonesia<sup>2</sup>Dental Material Science and Technology Department, Faculty of Dentistry, Universitas Padjadjaran, Bandung, Indonesia<sup>3</sup>Molecular Biology Department, Faculty of Medicine, Universitas Padjadjaran, Bandung, Indonesia

### CAN YOU TELL US HOW ANXIOUS YOU GET, IF AT ALL, WITH YOUR TOOTH EXTRACTION PROCEDURE?

PLEASE INDICATE BY INSERTING 'X' IN THE APPROPRIATE BOX

#### Appendix 1. Modified "Modified Dental Anxiety Scale" (MDAS)

|                                                                                                                         |                                         |                                              |                                            |                                          |                                               |
|-------------------------------------------------------------------------------------------------------------------------|-----------------------------------------|----------------------------------------------|--------------------------------------------|------------------------------------------|-----------------------------------------------|
| <b>1. If you were told that your tooth has to be extracted, how would you feel?</b>                                     |                                         |                                              |                                            |                                          |                                               |
|                                                                                                                         | Not<br>Anxious <input type="checkbox"/> | Slightly<br>Anxious <input type="checkbox"/> | Fairly<br>Anxious <input type="checkbox"/> | Very<br>Anxious <input type="checkbox"/> | Extremely<br>Anxious <input type="checkbox"/> |
| <b>2. If you were about to go to the dentist tomorrow to have your tooth extracted, how would you feel?</b>             |                                         |                                              |                                            |                                          |                                               |
|                                                                                                                         | Not<br>Anxious <input type="checkbox"/> | Slightly<br>Anxious <input type="checkbox"/> | Fairly<br>Anxious <input type="checkbox"/> | Very<br>Anxious <input type="checkbox"/> | Extremely<br>Anxious <input type="checkbox"/> |
| <b>3. If you were sitting at the dentist waiting room for your tooth extraction procedure, how would you feel?</b>      |                                         |                                              |                                            |                                          |                                               |
|                                                                                                                         | Not<br>Anxious <input type="checkbox"/> | Slightly<br>Anxious <input type="checkbox"/> | Fairly<br>Anxious <input type="checkbox"/> | Very<br>Anxious <input type="checkbox"/> | Extremely<br>Anxious <input type="checkbox"/> |
| <b>4. If you were about to have a local anesthetic injection in your gum, how would you feel?</b>                       |                                         |                                              |                                            |                                          |                                               |
|                                                                                                                         | Not<br>Anxious <input type="checkbox"/> | Slightly<br>Anxious <input type="checkbox"/> | Fairly<br>Anxious <input type="checkbox"/> | Very<br>Anxious <input type="checkbox"/> | Extremely<br>Anxious <input type="checkbox"/> |
| <b>5. If you were about to have your wisdom tooth extracted through a simple surgery procedure, how would you feel?</b> |                                         |                                              |                                            |                                          |                                               |
|                                                                                                                         | Not<br>Anxious <input type="checkbox"/> | Slightly<br>Anxious <input type="checkbox"/> | Fairly<br>Anxious <input type="checkbox"/> | Very<br>Anxious <input type="checkbox"/> | Extremely<br>Anxious <input type="checkbox"/> |

Instructions for scoring (remove this section below before copying for use with patients)

*The Modified Dental Anxiety Scale.* Each item scored as follows:

Not anxious = 1

Slightly anxious = 2

Fairly anxious = 3

Very anxious = 4

Extremely anxious = 5

Total score is a sum of all five items, range 5 to 25: Cut off is 19 or above which indicates a highly dentally anxious patient, possibly dentally phobic
